# Supplementary material
Source: MDPI journal article supplement (https://www.mdpi.com/2226-471X/6/1/46)
Supplement: s1 [file s1]

## Supplementary Materials- Complete Survey

### ATTITUDES TOWARDS SPANISH INSTRUCTORS AMONG SPANISH HERITAGE STUDENTS

Start of Block: Informed Consent

#### **Welcome to our Survey on attitudes towards Spanish instructors among Spanish heritage students!**

**IMPORTANT NOTICE:** Please complete this survey on a computer or a laptop. Some survey features will be lost if completed on a cell phone using its mobile version. Thanks very much for your collaboration!

Before you complete the survey, please read and sign the Informed Consent below.

#### INFORMED CONSENT FORM

You are invited to participate in a research study that is being conducted by Dr. Crystal Marull, Lecturer at University of Florida's Department of Spanish. Protocol Title: Attitudes towards Spanish Faculty Members among Spanish Heritage Students. Please read this consent document carefully before you decide to participate in this study.

**Purpose of the research study:** The purpose of this study is to examine how Spanish heritage students perceive and react to Spanish faculty members from different linguistic and cultural backgrounds.

**What you will be asked to do in the study:** First, you will be asked to provide some background information about yourself, the languages you speak, and your patterns of language use. Then, you will be asked to answer a series of questions about your college experience and your personal opinions on different college-related matters truthfully and candidly. All the questions will be answered on Qualtrics in survey format.

**Time required:** 15–45 minutes.

**Risks and Benefits:** There are no foreseen risks associated with this research protocol. The research team does not anticipate that you will benefit directly by participating in this experiment, however, we hope to shed light on questions related to the heritage speakers' college experience, which in turn may help future generations of students who share your linguistic and cultural background.

**Compensation:** Not all participants will be compensated for their participation, however, one participant in every 20 participants will receive a \$20 Amazon Gift Card. This means that the 20th, 40th, 60th, 80th... participants will be awarded a Gift Card. If you are one of the lucky winners, you will be notified via email.

**Confidentiality:** You do not have to provide the research team with your full name (only your initials) or any other personal identifiable data. Your initials and email address will be kept confidential to the extent provided by law. The research team and the Institutional Review Board at University of Florida are the only parties that will be allowed to see the data, except as may be required by law. If a report of this study is published, or the results are presented at a professional conference, only group results will be stated.

**Voluntary participation and right to withdraw from the study:** Your participation in this study is completely voluntary. There is no penalty for not participating. You may choose not to participate,

and you may withdraw at any time without any penalty to you. In addition, you may choose not to answer any questions with which you are not comfortable.

Who to contact if you have questions about the study: Crystal Marull, Ph.D. Coordinator of Online Courses in Spanish Spanish & Portuguese Studies, University of Florida, 251 Dauer Hall, 352.273.3789, cmarull@ufl.edu.

Who to contact about your rights as a research participant in the study: IRB02 Office, Box 112250, University of Florida, Gainesville, FL 32611-2250, Phone 392-0433.

Agreement: If you agree to the terms and conditions above, check "I consent" below. Then, you will be prompted to complete the survey. Otherwise, check "I do not consent"; that will end your participation.

☐ I consent (1)

☐ I do not consent (2)

End of Block: Informed Consent

Start of Block: Introduction

**INTRODUCTION:** According to Professor Guadalupe Valdés, a heritage language student in the context of American education is someone who was raised in a home where a non-English language is spoken, who speaks or understands the heritage language, and who is to some degree bilingual in English and the heritage language.

This survey focuses on Spanish as a heritage language, that is, Spanish as the language used or learned at home in a context in which English is the dominant societal language. Below are a few examples of the many different types of heritage Spanish speakers in the U.S.:

1) Kevin is a Heritage Speaker of Spanish. He is 20 years old and attends Rutgers University, where he is pursuing a degree in Political Science. He learned Spanish at home with his parents (from Guatemala) and learned English when he started to go to school at age 5. He is fluent in spoken English and spoken Spanish, but he can read and write well only in English.

2) Kimberly is a Heritage Speaker of Spanish. She is 27 years old and lives in Union City, NJ. She works as a dental hygienist. She learned Spanish at home talking to her parents (from Cuba) and interacting with the local Cuban community residing in Union City. She learned English in school and stopped speaking Spanish regularly at that time, when she was about 5 years old. She understands English and Spanish, but only speaks English.

3) Tomás is a Heritage Speaker of Spanish. He is 24 years old, lives in San Antonio, TX, and works as a journalist at a local newspaper. He immigrated to the US from Spain with his parents when he was four years old. He completed all his education in English but attended Spanish school on Saturdays. His reading, writing, speaking, and listening skills are equally advanced in English and Spanish.

4) Maia is a Heritage Speaker of Spanish. She is 18 years old and a freshman at UF, where she wants to study Veterinary Medicine. She learned both Spanish and English at home, given that her father is from Argentina and her mom is American. She is fluent in both languages although she thinks her written Spanish needs work.

Do you consider yourself a heritage speaker of Spanish according to the definition above? If your answer is yes, you may proceed to the survey. If your answer is no, your participation will be terminated.

☐ Yes (1)

☐ No (2)

End of Block: Introduction

Start of Block: SECTION A: Background information

### **SECTION A: BACKGROUND INFORMATION**

The following questions will help us understand your language use and linguistic background.

1 Preferred email address:

2 Initials of first name, middle name, and last name (e.g., José García Sánchez = JGS):

3 Current age:

4 Gender

5 College/University you attend (or graduated from):

6 Major/minor:

7 I consider myself bilingual/multilingual.

☐ Yes (1)

☐ No (2)

8 Enter below the languages you speak, in order of dominance:

|  | Language (1) |
|--|--------------|
|  |              |

|                                    |  |
|------------------------------------|--|
| Most dominant language (1)         |  |
| Second most dominant language (2)  |  |
| Third language (if applicable) (3) |  |

9 Enter below the languages you speak in the order that you learned them from birth:

|                                            |              |
|--------------------------------------------|--------------|
|                                            | Language (1) |
| Language(s) learned first (from birth) (1) |              |
| Language learned second (2)                |              |
| Third language (if applicable) (3)         |              |

10 Current exposure in percentage (%) to each language on average in a regular week. NOTE: Each row must add up to 100.

|  |             |             |                                    |
|--|-------------|-------------|------------------------------------|
|  | English (1) | Spanish (2) | Third language (if applicable) (3) |
|  |             |             |                                    |

|                  |  |  |  |
|------------------|--|--|--|
| At home (1)      |  |  |  |
| At school (2)    |  |  |  |
| At work (3)      |  |  |  |
| With friends (4) |  |  |  |

11 Years of formal education in each language:

|                                    |                        |
|------------------------------------|------------------------|
|                                    | Years of education (1) |
| Most dominant language (1)         |                        |
| Second most dominant language (2)  |                        |
| Third language (if applicable) (3) |                        |

12 Self-rated proficiency in English:

0=none    3=fair    5=adequate    7=good    10=perfect

0    1    2    3    4    5    6    7    8    9    10

|              |  |
|--------------|--|
| Reading ()   |  |
| Writing ()   |  |
| Listening () |  |
| Speaking ()  |  |

13 Self-rated proficiency in Spanish:

0=none    3=fair    5=adequate    7=good    10=perfect

0    1    2    3    4    5    6    7    8    9    10

|              |  |
|--------------|--|
| Reading ()   |  |
| Writing ()   |  |
| Listening () |  |
| Speaking ()  |  |

14 Countries where you have lived (including the United States) and length of residence in years and months. Only include countries where you have lived for 6 months or more.

|  |             |                         |
|--|-------------|-------------------------|
|  | Country (1) | Length of residence (2) |
|--|-------------|-------------------------|

|       |  |  |
|-------|--|--|
| 1 (1) |  |  |
| 2 (2) |  |  |
| 3 (3) |  |  |
| 4 (4) |  |  |

15 Where were you born? Please specify city, state, and country.

16 How old were you when you moved to the US? Enter N/A if not applicable to you.

17 Where was your father born? Please specify city, state, and country.

18 How old was your father when he moved to the US? Enter N/A if not applicable.

19 My father speaks the following languages:

20 With my father, I speak:

- ☐ (1) Only English (1)
- ☐ (2) Mostly English (2)
- ☐ (3) English and Spanish equally (3)
- ☐ (4) Mostly Spanish (4)
- ☐ (5) Only Spanish (5)
- ☐ (6) Other (6)

21 Where was your mother born? Please specify city, state, and country.

22 How old was your mother when she moved to the US? Enter N/A if not applicable.

24 With my mother, I speak:

- ☐ (1) Only English (1)
- ☐ (2) Mostly English (2)
- ☐ (3) English and Spanish equally (3)
- ☐ (4) Mostly Spanish (4)
- ☐ (5) Only Spanish (5)
- ☐ (6) Other (6)

☐ None (7)

☐ 1 (1)

☐ 2 (2)

☐ 3 (3)

☐ 4 (4)

☐ 5 (5)

☐ 6+ (6)

[illegible]



|                          |                       |                       |                       |                       |                       |                       |
|--------------------------|-----------------------|-----------------------|-----------------------|-----------------------|-----------------------|-----------------------|
| With<br>Sibling 2<br>(2) | <input type="radio"/> |
| With<br>Sibling 3<br>(3) | <input type="radio"/> |
| With<br>Sibling 4<br>(4) | <input type="radio"/> |
| With<br>Sibling 5<br>(5) | <input type="radio"/> |

27 Growing up, the language spoken at home was:

- ☐ (1) Only English (1)
- ☐ (2) Mostly English (2)
- ☐ (3) English and Spanish equally (3)
- ☐ (4) Mostly Spanish (4)
- ☐ (5) Only Spanish (5)
- ☐ (6) Other (6)

28 How do you identify?

- ☐ (1) Heritage speaker with North, Central, or South American Spanish family ties (Caribbean family ties are included in 1) (1)
- ☐ (2) Heritage speaker with Peninsular (Spain) Spanish family ties (2)
- ☐ (3) Both 1 and 2 (3)
- ☐ (4) Neither/Other. Please, explain: (4)

29 I usually use Spanish to communicate with the following people (check all that apply):

- ☐ Family members (1)
- ☐ Friends (2)
- ☐ Classmates (3)
- ☐ Coworkers (4)
- ☐ People in my community/neighborhood (5)
- ☐ Professors (6)
- ☐ Other. Please, specify: (7) \_\_\_\_\_
- ☐ Other. Please, specify: (8) \_\_\_\_\_

30 Please indicate if you agree or disagree with the following statements:

|                      |                          |                                     |                    |                   |
|----------------------|--------------------------|-------------------------------------|--------------------|-------------------|
| Strongly<br>disagree | Somewh<br>at<br>disagree | Neither<br>agree<br>nor<br>disagree | Somewh<br>at agree | Strongly<br>agree |
| 1                    | 2                        | 3                                   | 4                  | 5                 |

|                                                                                 |  |
|---------------------------------------------------------------------------------|--|
| I felt supported/encouraged by my family to use Spanish during my childhood. () |  |
|---------------------------------------------------------------------------------|--|

|                                                                                    |  |
|------------------------------------------------------------------------------------|--|
| I currently feel supported/encouraged by my family to use Spanish. ()              |  |
| I felt supported/encouraged by my school to use Spanish during my childhood. ()    |  |
| I currently feel supported/encouraged by my school/university to use Spanish. ()   |  |
| I felt supported/encouraged by my community to use Spanish during my childhood. () |  |
| I currently feel supported/encouraged by my community to use Spanish. ()           |  |
| I am confident in my spoken Spanish abilities. ()                                  |  |
| I am confident in my written Spanish abilities. ()                                 |  |
| People usually perceive my Spanish as good. ()                                     |  |
| I have felt discriminated against or judged for speaking Spanish. ()               |  |

End of Block: SECTION A: Background information

Start of Block: SECTION B: Faculty profiles and Course settings

### **SECTION B: FACULTY PROFILES AND COURSE SETTINGS**

In this section, you will be asked about your personal opinions concerning different types of Spanish instructors and different class formats commonly encountered in colleges/universities.

First, different instructor profiles will be presented. You must read the description for each profile and determine if you agree or disagree with the statements below.

**31 INSTRUCTOR PROFILE 1**

This instructor is a Spanish speaker who was born and raised in Spain, completed most of their education in Spanish in Spain, and came to the US as an adult. He/she is now pursuing a PhD in Literature or Spanish Linguistics and teaches courses in a Spanish department at a US college.

|                                                                                            | Strongly<br>disagree | Somewh<br>at<br>disagree | Neither<br>agree<br>nor<br>disagree | Somewh<br>at agree | Strongly<br>agree |
|--------------------------------------------------------------------------------------------|----------------------|--------------------------|-------------------------------------|--------------------|-------------------|
|                                                                                            | 1                    | 2                        | 3                                   | 4                  | 5                 |
| He/she and I would have some similar cultural knowledge and experiences. ()                |                      |                          |                                     |                    |                   |
| He/she possesses strong grammatical knowledge in Spanish. ()                               |                      |                          |                                     |                    |                   |
| He/she possesses strong content knowledge in Spanish Linguistics and/or Literature. ()     |                      |                          |                                     |                    |                   |
| He/she is empathetic towards Spanish heritage students and diverse student populations. () |                      |                          |                                     |                    |                   |
| He/she understands my needs and challenges as a college student. ()                        |                      |                          |                                     |                    |                   |
| He/she appreciates and values my cultural and linguistic background. ()                    |                      |                          |                                     |                    |                   |
| I think I can trust him/her. ()                                                            |                      |                          |                                     |                    |                   |
| I think he/she would act as an academic advocate if needed. ()                             |                      |                          |                                     |                    |                   |

|                                                                                                                                       |  |
|---------------------------------------------------------------------------------------------------------------------------------------|--|
| I think he/she would give culturally sensitive feedback to Spanish heritage students. ()                                              |  |
| I think he/she would underestimate my linguistic abilities. ()                                                                        |  |
| I think he/she possesses a high level of fluency in the language and can provide a model for language production and language use. () |  |
| I respect his/her linguistic abilities in Spanish. ()                                                                                 |  |
| I think I can open up to him/her. ()                                                                                                  |  |

### 32 INSTRUCTOR PROFILE 2

This instructor is a Spanish speaker who was born and raised in a Latin American Spanish-speaking country, completed most of their education in Spanish in their country of origin, and came to the US as an adult. He/she is now pursuing a PhD in Literature or Spanish Linguistics and teaches courses in a Spanish department at a US college.

|                                                                             | Strongly disagree | Somewh at disagree | Neither agree nor disagree | Somewh at agree | Strongly agree |
|-----------------------------------------------------------------------------|-------------------|--------------------|----------------------------|-----------------|----------------|
|                                                                             | 1                 | 2                  | 3                          | 4               | 5              |
| He/she and I would have some similar cultural knowledge and experiences. () |                   |                    |                            |                 |                |
| He/she possesses strong grammatical knowledge in Spanish. ()                |                   |                    |                            |                 |                |

|                                                                                                                                       |  |
|---------------------------------------------------------------------------------------------------------------------------------------|--|
| He/she possesses strong content knowledge in Spanish Linguistics and/or Literature. ()                                                |  |
| He/she is empathetic towards Spanish heritage students and diverse student populations. ()                                            |  |
| He/she understands my needs and challenges as a college student. ()                                                                   |  |
| He/she appreciates and values my cultural and linguistic background. ()                                                               |  |
| I think I can trust him/her. ()                                                                                                       |  |
| I think he/she would act as an academic advocate if needed. ()                                                                        |  |
| I think he/she would give culturally sensitive feedback to Spanish heritage students. ()                                              |  |
| I think he/she would underestimate my linguistic abilities. ()                                                                        |  |
| I think he/she possesses a high level of fluency in the language and can provide a model for language production and language use. () |  |
| I respect his/her linguistic abilities in Spanish. ()                                                                                 |  |
| I think I can open up to him/her. ()                                                                                                  |  |

This instructor is a Spanish speaker who was born and raised in the US, identifies as Heritage Spanish Speaker, and completed their education mostly in the US and in English. He/she is now pursuing a PhD in Literature or Spanish Linguistics and teaches courses in a Spanish department at a US college.

|                                                                                            | Strongly<br>disagree | Somewh<br>at<br>disagree | Neither<br>agree<br>nor<br>disagree | Somewh<br>at agree | Strongly<br>agree |
|--------------------------------------------------------------------------------------------|----------------------|--------------------------|-------------------------------------|--------------------|-------------------|
|                                                                                            | 1                    | 2                        | 3                                   | 4                  | 5                 |
| He/she and I would have some similar cultural knowledge and experiences. ()                |                      |                          |                                     |                    |                   |
| He/she possesses strong grammatical knowledge in Spanish. ()                               |                      |                          |                                     |                    |                   |
| He/she possesses strong content knowledge in Spanish Linguistics and/or Literature. ()     |                      |                          |                                     |                    |                   |
| He/she is empathetic towards Spanish heritage students and diverse student populations. () |                      |                          |                                     |                    |                   |
| He/she understands my needs and challenges as a college student. ()                        |                      |                          |                                     |                    |                   |
| He/she appreciates and values my cultural and linguistic background. ()                    |                      |                          |                                     |                    |                   |
| I think I can trust him/her. ()                                                            |                      |                          |                                     |                    |                   |
| I think he/she would act as an academic advocate if needed. ()                             |                      |                          |                                     |                    |                   |
| I think he/she would give culturally sensitive feedback to Spanish heritage students. ()   |                      |                          |                                     |                    |                   |

|                                                                                                                                       |  |
|---------------------------------------------------------------------------------------------------------------------------------------|--|
| I think he/she would underestimate my linguistic abilities. ()                                                                        |  |
| I think he/she possesses a high level of fluency in the language and can provide a model for language production and language use. () |  |
| I respect his/her linguistic abilities in Spanish. ()                                                                                 |  |
| I think I can open up to him/her. ()                                                                                                  |  |

#### 34 **INSTRUCTOR PROFILE 4**

This instructor is an English speaker who was born and raised in the US, completed their education mostly in the US, learnt Spanish as a second language in school, and lived in a Spanish-speaking country for an extended period of time (between 6 months and 5 years). He/she is now pursuing a PhD in Literature or Spanish Linguistics and teaches courses in a Spanish department at a US college.

|                                                                                            | Strongly disagree | Somewhat at disagree | Neither agree nor disagree | Somewhat at agree | Strongly agree |
|--------------------------------------------------------------------------------------------|-------------------|----------------------|----------------------------|-------------------|----------------|
|                                                                                            | 1                 | 2                    | 3                          | 4                 | 5              |
| He/she and I would have some similar cultural knowledge and experiences. ()                |                   |                      |                            |                   |                |
| He/she possesses strong grammatical knowledge in Spanish. ()                               |                   |                      |                            |                   |                |
| He/she possesses strong content knowledge in Spanish Linguistics and/or Literature. ()     |                   |                      |                            |                   |                |
| He/she is empathetic towards Spanish heritage students and diverse student populations. () |                   |                      |                            |                   |                |



|                                                                                                                                       |  |
|---------------------------------------------------------------------------------------------------------------------------------------|--|
| He/she understands my needs and challenges as a college student. ()                                                                   |  |
| He/she appreciates and values my cultural and linguistic background. ()                                                               |  |
| I think I can trust him/her. ()                                                                                                       |  |
| I think he/she would act as an academic advocate if needed. ()                                                                        |  |
| I think he/she would give culturally sensitive feedback to Spanish heritage students. ()                                              |  |
| I think he/she would underestimate my linguistic abilities. ()                                                                        |  |
| I think he/she possesses a high level of fluency in the language and can provide a model for language production and language use. () |  |
| I respect his/her linguistic abilities in Spanish. ()                                                                                 |  |
| I think I can open up to him/her. ()                                                                                                  |  |

Now different class formats and course types will be presented. You must read the description for each format/type and determine if you agree or disagree with the statements below.

35 Face-to-face setting: Teaching is done in a classroom at a set time on specific dates. Students must physically attend the class. Traditional college classes are usually face-to-face. Online setting: Learning materials are available in their entirety through an online platform. Usually, the students can log in at any time and complete their assignments at their own pace as long as they meet the set deadlines. Courses taken in their entirety on Sakai, Blackboard, eCollege, Canvas, etc., are online courses.

Spanish language course: Courses geared towards improving all aspects of the Spanish language (reading, writing, listening, speaking, vocabulary, fluency, cultural awareness). These courses may

mix students who are learning Spanish as a second language and heritage Spanish speakers. For instance, Spanish I, Spanish II, Advanced Spanish Grammar and Composition, Oral Spanish.

**Heritage Spanish language course:** Courses geared towards improving mostly written Spanish abilities, mastering different registers in spoken and written Spanish, expanding cultural knowledge, and increasing confidence in using the language. Only heritage speakers may take these courses. Examples are Spanish for Native Speakers, Spanish for Heritage Speakers, Spanish for Bilinguals, Culture and Composition for Heritage Speakers.

**Content course in Spanish:** Courses that specialize in a topic such as literature, linguistics, translation/interpreting, or cultural analysis AND are taught in Spanish. Examples of these courses are Introduction to Hispanic Literature, Spanish Linguistics, Introduction to Translation, Medical Interpreting, or Spanish Culture.

|                      |                          |                                     |                    |                   |
|----------------------|--------------------------|-------------------------------------|--------------------|-------------------|
| Strongly<br>disagree | Somewh<br>at<br>disagree | Neither<br>agree<br>nor<br>disagree | Somewh<br>at agree | Strongly<br>agree |
| 1                    | 2                        | 3                                   | 4                  | 5                 |

|                                                                                                                             |  |
|-----------------------------------------------------------------------------------------------------------------------------|--|
| I am very interested in taking face-to-face courses to improve my Spanish. ()                                               |  |
| I am very interested in taking online courses to improve my Spanish. ()                                                     |  |
| I am very interested in taking face-to-face content courses in Spanish. ()                                                  |  |
| I am very interested in taking online content courses in Spanish. ()                                                        |  |
| Face-to-face Spanish courses help you improve the language more than online Spanish courses. ()                             |  |
| Face-to-face content courses in Spanish help you increase content knowledge more than online content courses in Spanish. () |  |

End of Block: SECTION B: Faculty profiles and Course settings

Start of Block: SECTION C: Spanish language courses

### **SECTION C: SPANISH LANGUAGE COURSES**

In this section, you will be asked about your opinions on different aspects related to Spanish language courses.

What is meant by "Spanish language courses"?

Spanish language courses are courses geared towards improving all aspects of the Spanish language (reading, writing, listening, speaking, vocabulary, fluency, cultural awareness). For instance, Spanish I, Spanish II, Advanced Spanish Grammar and Composition, and Oral Spanish are Spanish language courses usually offered at many colleges. These courses may mix students who are learning Spanish as a second language and heritage Spanish speakers.

36 What Spanish language courses have you taken at the college level in a traditional, face-to-face classroom setting? Enter N/A if not applicable to you.

37 What Spanish language courses have you taken at the college level in an online classroom setting? Enter N/A if not applicable to you.

38 Were any of those courses taught by American English speakers who learned Spanish as a second language? If yes, please enter which courses.

☐ Yes (1) \_\_\_\_\_

☐ No (2)

☐ N/A (3)

39 Were any of those courses taught by Spanish heritage speakers? If yes, please enter which ones.

☐ Yes (1) \_\_\_\_\_

☐ No (2)

☐ N/A (3)

40 Were any of those courses taught by Spanish speakers who were born and raised in a Spanish-speaking country? If yes, please enter which ones.

☐ Yes (1) \_\_\_\_\_

☐ No (2)

☐ N/A (3)

41 Indicate if you agree or disagree with the following statements:

|                                                                                                                                                        | Strongly<br>disagree | Somewh<br>at<br>disagree | Neither<br>agree<br>nor<br>disagree | Somewh<br>at agree | Strongly<br>agree |
|--------------------------------------------------------------------------------------------------------------------------------------------------------|----------------------|--------------------------|-------------------------------------|--------------------|-------------------|
|                                                                                                                                                        | 1                    | 2                        | 3                                   | 4                  | 5                 |
| When (if) I take a Spanish language course, the instructor's linguistic background plays an important role when deciding to stay or drop the class. () |                      |                          |                                     |                    |                   |
| When (if) I take a Spanish language course, the instructor's linguistic background is an important factor in my academic satisfaction. ()              |                      |                          |                                     |                    |                   |

42 Now, let's focus on the previous instructor profiles you read about. You have another chance to read each description below.

**INSTRUCTOR PROFILE 1:** This instructor is a Spanish speaker who was born and raised in Spain, completed most of their education in Spanish in Spain, and came to the US as an adult. He/she is now pursuing a PhD in Literature or Spanish Linguistics and teaches courses in a Spanish department at a US college.

**INSTRUCTOR PROFILE 2:** This instructor is a Spanish speaker who was born and raised in a Latin American Spanish-speaking country, completed most of their education in Spanish in their country of origin, and came to the US as an adult. He/she is now pursuing a PhD in Literature or Spanish Linguistics and teaches courses in a Spanish department at a US college.

**INSTRUCTOR PROFILE 3:** This instructor is a Spanish speaker who was born and raised in the US, identifies as Heritage Spanish Speaker, and completed their education mostly in the US and in English. He/she is now pursuing a PhD in Literature or Spanish Linguistics and teaches courses in a Spanish department at a US college.

**INSTRUCTOR PROFILE 4:** This instructor is an English speaker who was born and raised in the US, completed their education mostly in the US, learnt Spanish as a second language in school, and lived in a Spanish-speaking country for an extended period of time (between 6 months and 5 years). He/she is now pursuing a PhD in Literature or Spanish Linguistics and teaches courses in a Spanish department at a US college.

Based on these profiles, indicate how likely you are to do the following:

|                                                                   | Extremel<br>y<br>unlikely | Somewh<br>at<br>unlikely | Neither<br>likely<br>nor<br>unlikely | Somewh<br>at likely | Extremel<br>y likely |
|-------------------------------------------------------------------|---------------------------|--------------------------|--------------------------------------|---------------------|----------------------|
|                                                                   | 1                         | 2                        | 3                                    | 4                   | 5                    |
| Take a face-to-face Spanish language course with Instructor 1. () |                           |                          |                                      |                     |                      |
| Take a face-to-face Spanish language course with Instructor 2. () |                           |                          |                                      |                     |                      |
| Take a face-to-face Spanish language course with Instructor 3. () |                           |                          |                                      |                     |                      |
| Take a face-to-face Spanish language course with Instructor 4. () |                           |                          |                                      |                     |                      |
| Take an online Spanish language course with Instructor 1. ()      |                           |                          |                                      |                     |                      |
| Take an online Spanish language course with Instructor 2. ()      |                           |                          |                                      |                     |                      |
| Take an online Spanish language course with Instructor 3. ()      |                           |                          |                                      |                     |                      |
| Take an online Spanish language course with Instructor 4. ()      |                           |                          |                                      |                     |                      |

43 Imagine that you can choose the instructor who will teach your Spanish language class. Order the instructor profiles 1, 2, 3, and 4 from your first choice to your last choice (i.e., Enter 1 for Profile 1, 2 for Profile 2, 3 for Profile 3, and 4 for Profile 4):

|                                                        | First choice (1) | Second choice (2) | Third choice (3) | Fourth choice (4) |
|--------------------------------------------------------|------------------|-------------------|------------------|-------------------|
| To take a face-to-face Spanish language course.<br>(1) |                  |                   |                  |                   |
| To take an online Spanish language course.<br>(2)      |                  |                   |                  |                   |

44 When I take a Spanish language course with students who are learning Spanish as a second language, I usually think that:

- ☐ I have an advantage over them. (1)
- ☐ We all are on equal footing. (2)
- ☐ I have a disadvantage compared to them. (3)

End of Block: SECTION C: Spanish language courses

Start of Block: SECTION D: Heritage Spanish language courses

#### **SECTION D: HERITAGE SPANISH LANGUAGE COURSES**

In this section, you will be asked about your opinions on different aspects related to Heritage Spanish language courses.

What is meant by "Heritage Spanish language courses"?

Heritage Spanish language courses are courses geared towards improving mostly written Spanish abilities, mastering different registers in spoken and written Spanish, expanding cultural knowledge, and increasing confidence in using the language. Only heritage speakers may take these courses. Spanish for Native Speakers, Spanish for Heritage Speakers, Spanish for Bilinguals, Culture and Composition for Heritage Speakers are examples of this type of courses offered at US colleges.

45 What Heritage Spanish language courses, if any, have you taken at the college level in a traditional, face-to-face classroom setting? Enter N/A if not applicable to you.

46 What Heritage Spanish language courses have you taken at the college level in an online classroom setting? Enter N/A if not applicable to you.

47 Were any of those courses taught by American English speakers who learned Spanish as a second language? If yes, please enter the course name.

☐ Yes (1) \_\_\_\_\_

☐ No (2)

☐ N/A (3)

48 Were any of those courses taught by Spanish heritage speakers? If yes, please enter the course name.

☐ Yes (1) \_\_\_\_\_

☐ No (2)

☐ N/A (3)

49 Were any of those courses taught by Spanish speakers who were born and raised in a Spanish-speaking country? If yes, please enter the course name.

☐ Yes (1) \_\_\_\_\_

☐ No (2)

☐ N/A (3)

50 Indicate if you agree or disagree with the following statements:

|                                                                                                                                     | Strongly disagree | Somewh at disagree | Neither agree nor disagree | Somewh at agree | Strongly agree |
|-------------------------------------------------------------------------------------------------------------------------------------|-------------------|--------------------|----------------------------|-----------------|----------------|
|                                                                                                                                     | 1                 | 2                  | 3                          | 4               | 5              |
| The instructor's linguistic background plays an important role when deciding to stay or drop a Heritage Spanish language course. () |                   |                    |                            |                 |                |
| The instructor's linguistic background is an important factor in my academic satisfaction in a Heritage Spanish language course. () |                   |                    |                            |                 |                |

51 Now, let's focus on the previous instructor profiles you read about. You have another chance to read each description below.

**INSTRUCTOR PROFILE 1:** This instructor is a Spanish speaker who was born and raised in Spain, completed most of their education in Spanish in Spain, and came to the US as an adult. He/she is now pursuing a PhD in Literature or Spanish Linguistics and teaches courses in a Spanish department at a US college.

**INSTRUCTOR PROFILE 2:** This instructor is a Spanish speaker who was born and raised in a Latin American Spanish-speaking country, completed most of their education in Spanish in their country of origin, and came to the US as an adult. He/she is now pursuing a PhD in Literature or Spanish Linguistics and teaches courses in a Spanish department at a US college.

**INSTRUCTOR PROFILE 3:** This instructor is a Spanish speaker who was born and raised in the US, identifies as Heritage Spanish Speaker, and completed their education mostly in the US and in English. He/she is now pursuing a PhD in Literature or Spanish Linguistics and teaches courses in a Spanish department at a US college.

**INSTRUCTOR PROFILE 4:** This instructor is an English speaker who was born and raised in the US, completed their education mostly in the US, learnt Spanish as a second language in school, and lived in a Spanish-speaking country for an extended period of time (between 6 months and 5 years). He/she is now pursuing a PhD in Literature or Spanish Linguistics and teaches courses in a Spanish department at a US college.

Based on these profiles, indicate how likely you are to do the following:



|                                                                            | Extremel<br>y<br>unlikely | Somewh<br>at<br>unlikely | Neither<br>likely<br>nor<br>unlikely | Somewh<br>at likely | Extremel<br>y likely |
|----------------------------------------------------------------------------|---------------------------|--------------------------|--------------------------------------|---------------------|----------------------|
|                                                                            | 1                         | 2                        | 3                                    | 4                   | 5                    |
| Take a face-to-face Heritage Spanish language course with Instructor 1. () |                           |                          |                                      |                     |                      |
| Take a face-to-face Heritage Spanish language course with Instructor 2. () |                           |                          |                                      |                     |                      |
| Take a face-to-face Heritage Spanish language course with Instructor 3. () |                           |                          |                                      |                     |                      |
| Take a face-to-face Heritage Spanish language course with Instructor 4. () |                           |                          |                                      |                     |                      |
| Take an online Heritage Spanish language course with Instructor 1. ()      |                           |                          |                                      |                     |                      |
| Take an online Heritage Spanish language course with Instructor 2. ()      |                           |                          |                                      |                     |                      |
| Take an online Heritage Spanish language course with Instructor 3. ()      |                           |                          |                                      |                     |                      |
| Take an online Heritage Spanish language course with Instructor 4. ()      |                           |                          |                                      |                     |                      |

52 Imagine that you can choose the instructor that will teach your Heritage Spanish language class. Order Profiles 1, 2, 3, and 4 from your first choice to your last choice (enter 1 for Profile 1, 2 for Profile 2, 3 for Profile 3, and 4 for Profile 4):

|                                                                 | First choice (1) | Second choice (2) | Third choice (3) | Fourth choice (4) |
|-----------------------------------------------------------------|------------------|-------------------|------------------|-------------------|
| To take a face-to-face Heritage Spanish language course.<br>(1) |                  |                   |                  |                   |
| To take an online Heritage Spanish language course.<br>(2)      |                  |                   |                  |                   |

End of Block: SECTION D: Heritage Spanish language courses

Start of Block: SECTION E: Content courses in Spanish

### **SECTION E: CONTENT COURSES IN SPANISH**

In this section, you will be asked about your opinions related to content courses taught in Spanish.

What is meant by "content courses in Spanish"?

Content courses in Spanish are courses that specialize in a topic such as literature, linguistics, translation/interpreting, or cultural analysis AND are taught in Spanish. Examples of these courses are Introduction to Hispanic Literature, Spanish Linguistics, Introduction to Translation, Medical Interpreting, or Spanish Culture.

53 What are the names of the content courses in Spanish that have you taken at the college level in a traditional, face-to-face classroom setting? Enter N/A if not applicable to you.

54 What are the names of the content courses in Spanish that have you taken at the college level in an online classroom setting? Enter N/A if not applicable to you.

55 Were any of those courses taught by American English speakers who learned Spanish as a second language? If yes, please enter which courses.

☐ Yes (1) \_\_\_\_\_

☐ No (2)

☐ N/A (3)

56 Were any of those courses taught by Spanish heritage speakers? If yes, please enter which courses.

☐ Yes (1) \_\_\_\_\_

☐ No (2)

☐ N/A (3)

57 Were any of those courses taught by Spanish speakers who were born and raised in a Spanish-speaking country? If yes, please enter which courses.

☐ Yes (1) \_\_\_\_\_

☐ No (2)

☐ N/A (3)

58 Indicate if you agree or disagree with the following statements:

|                      |                          |                                     |                    |                   |
|----------------------|--------------------------|-------------------------------------|--------------------|-------------------|
| Strongly<br>disagree | Somewh<br>at<br>disagree | Neither<br>agree<br>nor<br>disagree | Somewh<br>at agree | Strongly<br>agree |
|----------------------|--------------------------|-------------------------------------|--------------------|-------------------|

|   |   |   |   |   |
|---|---|---|---|---|
| 1 | 2 | 3 | 4 | 5 |
|---|---|---|---|---|

|                                                                                                                                       |  |
|---------------------------------------------------------------------------------------------------------------------------------------|--|
| The instructor's linguistic background plays an important role when deciding to stay or drop a content course in Spanish. ()          |  |
| The instructor's linguistic background is an important factor in my academic satisfaction when taking a content course in Spanish. () |  |

59 Now, let's focus on the previous instructor profiles you read about. You have another chance to read each description below.

**INSTRUCTOR PROFILE 1:** This instructor is a Spanish speaker who was born and raised in Spain, completed most of their education in Spanish in Spain, and came to the US as an adult. He/she is now

pursuing a PhD in Literature or Spanish Linguistics and teaches courses in a Spanish department at a US college.

**INSTRUCTOR PROFILE 2:** This instructor is a Spanish speaker who was born and raised in a Latin American Spanish-speaking country, completed most of their education in Spanish in their country of origin, and came to the US as an adult. He/she is now pursuing a PhD in Literature or Spanish Linguistics and teaches courses in a Spanish department at a US college.

**INSTRUCTOR PROFILE 3:** This instructor is a Spanish speaker who was born and raised in the US, identifies as Heritage Spanish Speaker, and completed their education mostly in the US and in English. He/she is now pursuing a PhD in Literature or Spanish Linguistics and teaches courses in a Spanish department at a US college.

**INSTRUCTOR PROFILE 4:** This instructor is an English speaker who was born and raised in the US, completed their education mostly in the US, learnt Spanish as a second language in school, and lived in a Spanish-speaking country for an extended period of time (between 6 months and 5 years). He/she is now pursuing a PhD in Literature or Spanish Linguistics and teaches courses in a Spanish department at a US college.

Based on these profiles, indicate how likely you are to do the following:

|                                                                     | Extremel<br>y<br>unlikely | Somewh<br>at<br>unlikely | Neither<br>likely<br>nor<br>unlikely | Somewh<br>at likely | Extremel<br>y likely |
|---------------------------------------------------------------------|---------------------------|--------------------------|--------------------------------------|---------------------|----------------------|
|                                                                     | 1                         | 2                        | 3                                    | 4                   | 5                    |
| Take a face-to-face content course in Spanish with Instructor 1. () |                           |                          |                                      |                     |                      |
| Take a face-to-face content course in Spanish with Instructor 2. () |                           |                          |                                      |                     |                      |
| Take a face-to-face content course in Spanish with Instructor 3. () |                           |                          |                                      |                     |                      |
| Take a face-to-face content course in Spanish with Instructor 4. () |                           |                          |                                      |                     |                      |
| Take an online content course in Spanish with Instructor 1. ()      |                           |                          |                                      |                     |                      |

|                                                                   |  |
|-------------------------------------------------------------------|--|
| Take an online content course in Spanish<br>with Instructor 2. () |  |
| Take an online content course in Spanish<br>with Instructor 3. () |  |
| Take an online content course in Spanish<br>with Instructor 4. () |  |

60 Imagine that you can choose the instructor that will teach your content course in Spanish. Order instructor profiles 1, 2, 3, and 4 from your first choice to your last choice (enter 1 for Profile 1, 2 for Profile 2, 3 for Profile 3, and 4 for Profile 4):

|                                                       | First choice (1) | Second choice (2) | Third choice (3) | Fourth choice (4) |
|-------------------------------------------------------|------------------|-------------------|------------------|-------------------|
| To take a face-to-face content course in Spanish. (1) |                  |                   |                  |                   |
| To take an online content course in Spanish. (2)      |                  |                   |                  |                   |

End of Block: SECTION E: Content courses in Spanish

Start of Block: SECTION F: Open-ended questions

### **SECTION F: OPEN-ENDED QUESTIONS**

These questions are about your college experience as a heritage student taking courses in a Spanish department. Please be as detailed as possible when responding. Your answers make this research project possible and the research team are very grateful for your time and effort!

61 What advice would you give to an instructor who is teaching a Heritage Spanish class for the first time to heritage students like you?

62 What advice would you give to an instructor who is teaching a Spanish language class for the first time to heritage students like you AND students who are learning Spanish as a second language (i.e., intermediate Spanish, Spanish grammar)?

63 What advice would you give to an instructor who is teaching a content class in Spanish for the first time to heritage students like you AND students who are learning Spanish as a second language (i.e., Spanish literature, translation)?

64 Please add any relevant information you have not had the chance to share earlier in this Questionnaire. The more information, the better. Thanks so much for your help!

End of Block: SECTION F: Open-ended questions

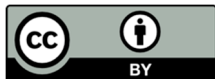

© **Copyright:** © 2021 by the authors. Licensee MDPI, Basel, Switzerland. This article is an open access article distributed under the terms and conditions of the Creative Commons Attribution (CC BY) license (<http://creativecommons.org/licenses/by/4.0/>).
